# Supplementary material for: PilG and PilH antagonistically control flagellum-dependent and pili-dependent motility in the phytopathogen Xanthomonas campestris pv. campestris
Source: PubMed Central journal article supplement (PMC7029496; doi:10.1186/s12866-020-1712-3), 2020-02-18
Supplement: 12866_2020_1712_MOESM1_ESM.pdf [file 12866_2020_1712_MOESM1_ESM.pdf]

**A**

PilG<sub>Xcc</sub> (1) MTENMAAGGELAGLKVMVIDDSKTIRRTAETLLKREGCEVVTATDGFEALAKIADQQPQIIFVDIMMPRLD  
 PilG<sub>Pa</sub> (1) -----MVIDDSKTIRRTAETLLKREGCEVVTADGFEALAKIADQQPQIIFVDIMMPRLD  
 PilG<sub>L.en</sub> (1) -----MEQQSDGLKVMVIDDSKTIRRTAETLLKKGCDVITADGFDALAKIADTHPNIIFVDIMMPRLD  
 PilG<sub>A.ba</sub> (1) -----MEDAFQNLKVMVIDDSKTIRRTAETLLQREGCEVITAVDGFEALS KIAEANFDIVFVDIMMPRLD  
 PilG<sub>Xcc</sub> (72) GYQTCALIKGNQLFKSTPVIMLSSKDGLFDKARGRIVGSEQYLTKPFTREELLSAIRTYVNA-----  
 PilG<sub>Pa</sub> (56) GYQTCALIKNNQLFKGTPVIMLSSKDGLFDKARGRIVGSEQYLTKPFTREELLD AIRKHVHA-----  
 PilG<sub>L.en</sub> (66) GYQTCALIKNNSAFKSTPVIMLSSKDGLFDKAKGRIVGSDQYLTKPFSKEELLGAIKAHVPSFTPVDAVS  
 PilG<sub>A.ba</sub> (66) GYQTCALIKNSQNYQNI PVIMLSSKDGLFDQAKGRVVGSD EYLT KPFSKDELLNAIRNHVSS-----

**B**

PilH<sub>Xcc</sub> (1) MARIILIEDSPTDRAVFSQWLEKAGHTVVATDNAEEGLELIRSQAPDLVLM DVVLPGMSGFQATRALARD  
 PilH<sub>Pa</sub> (1) MARIILIEDSPTDTAVLTQLLQRNGHEVF AAGSAEDGIEAAKRELPDLVMM DVVLPGMNGFQATRALS RD  
 PilH<sub>L.en</sub> (1) MARILIVDDSPTEMYKLTAMLEKHGHQVLKAENGGDVALARQEKPDVVLMDIVMPGLNGFQATRQLTKD  
 PilH<sub>A.ba</sub> (1) MARILIVDDSPTE TFRFKEILTKHGYDVLEASNGADGVT LAKAEQPDVLM DVVMPGVNGFQATRQITRD  
 PilH<sub>Xcc</sub> (71) QATKDI PVLLVSTKGMETDKAWGLRQGASDYIVKPPREDDLIARIKQLVR-  
 PilH<sub>Pa</sub> (71) EQTKQI PVLIVSTKGMETDRAWGMRQGARDYIVKPPREDDLIARIKELLDK  
 PilH<sub>L.en</sub> (71) AETSAIPV IIVTTKQETDKVWGKRQGARDYLT KPVD EETLLKTINAVLAG  
 PilH<sub>A.ba</sub> (71) EDTKHI PVVIVSTKQATDRVWGKRQGAIDYLIKPIEEKQLIDVIKQFLN-

**C**

PilG<sub>Xcc</sub> (1) MTENMAAGGELAGLKVMVIDDSKTIRRTAETLLKREGCE-VVTATDGFEALAKIADQQPQIIFVDIMMPR  
 PilH<sub>Xcc</sub> (1) -----MARIILIEDSPTDRAVFSQWLEKAGHT-VVATDNAEEGLELIRSQAPDLVLM DVVLPG  
 CheY<sub>Xcc</sub> (1) -----MSARILVVDD SASM RQMV SFALTSAGFA-VEEAEDGAVALGRAKGQRFNAVVT DVNMPN  
 CheY<sub>Ec</sub> (1) -----MADKELKFLVVDDFSTMRRI VRNLLKELGFNNVEEAEDGLDALNKLQAGGYGFVISDWNMPN  
 PilG<sub>Xcc</sub> (70) LDGYQTCALIKGNQLFKSTPVIMLSSKDGLFDKARGRIVGSEQYLTKPFTREELLSAIRTYVNA---  
 PilH<sub>Xcc</sub> (58) MSGFQATRALARDQATKDI PVLLVSTKGMETDKAWGLRQGASDYIVKPPREDDLIARIKQLVR----  
 CheY<sub>Xcc</sub> (59) MDGISLIRELRQLPDYKFTPMLMLTTESAADKKSEGKAAGATGWLVKPFNPEQLIATVQKVLG----  
 CheY<sub>Ec</sub> (65) MDGLELLKTIRADGAMSALPVLVMTAEAKKENI IAAAQAGASGYVVKPFTAATLEEKLNKIFEKLGM
