# Supplementary material for: PilG and PilH antagonistically control flagellum-dependent and pili-dependent motility in the phytopathogen Xanthomonas campestris pv. campestris
Source: PubMed Central journal article supplement (PMC7029496; doi:10.1186/s12866-020-1712-3), 2020-02-18
Supplement: 12866_2020_1712_MOESM3_ESM.pdf [file 12866_2020_1712_MOESM3_ESM.pdf]

| ID             | Gene | Description                                                   | Expresion level |        | Semi RT-PCR                     |
|----------------|------|---------------------------------------------------------------|-----------------|--------|---------------------------------|
|                |      |                                                               | pilH            | pilG   | $\Delta$ pilH/wt/ $\Delta$ pilG |
| <i>XC_2320</i> |      | methyl-accepting chemotaxis protein I, serine sensor receptor | 2.16 ↑          | 5.10 ↓ |                                 |
| <i>XC_2302</i> | CheY | chemotaxis protein CheY                                       | 2.53 ↑          | 2.20 ↓ |                                 |
| <i>XC_2311</i> |      | methyl-accepting chemotaxis protein I, serine sensor receptor | 2.38 ↑          | 3.43 ↓ |                                 |
| <i>XC_2245</i> |      | flagellar protein                                             | 4.36 ↑          | 2.83 ↓ |                                 |
| <i>XC_2309</i> |      | methyl-accepting chemotaxis protein I, serine sensor receptor | 2.13 ↑          | 3.51 ↓ |                                 |
| <i>XC_1413</i> |      | methyl-accepting chemotaxis protein                           | 2.62 ↑          | 2.39 ↓ |                                 |
| <i>XC_0638</i> |      | methyl-accepting chemotaxis protein I, serine sensor receptor | 2.36 ↑          | 2.35 ↓ |                                 |
| <i>XC_2321</i> | CheR | chemotaxis protein methyltransferase CheR                     | 2.69 ↑          | 3.71 ↓ |                                 |
| <i>XC_2306</i> |      | chemotaxis protein                                            | 2.45 ↑          | 3.25 ↓ |                                 |
| <i>XC_2264</i> | FliJ | flagellar FliJ protein                                        | 2.36 ↑          | 6.73 ↓ |                                 |
| <i>XC_1410</i> | CheR | chemotaxis protein methyltransferase CheR                     | 2.06 ↑          | 3.23 ↓ |                                 |
| <i>XC_2303</i> | CheA | sensor kinase CheA                                            | 2.43 ↑          | 2.20 ↓ |                                 |
| <i>XC_2314</i> |      | methyl-accepting chemotaxis protein I, serine sensor receptor | 4.35 ↑          | 2.03 ↓ |                                 |
| <i>XC_2785</i> |      | helicase                                                      | 2.71 ↑          | 2.23 ↓ |                                 |
| <i>XC_2301</i> |      | conserved hypothetical protein                                | 2.50 ↑          | 2.81 ↓ |                                 |
| <i>XC_1414</i> | CheA | chemotaxis histidine protein kinase                           | 2.31 ↑          | 2.10 ↓ |                                 |
| <i>XC_2230</i> |      | conserved hypothetical protein                                | 2.04 ↑          | 2.45 ↓ |                                 |
| <i>XC_1201</i> | RebB | RebB protein                                                  | 2.11 ↑          | 2.89 ↓ |                                 |
| 16s            |      |                                                               |                 |        |                                 |
