# Supplementary material for: PilG and PilH antagonistically control flagellum-dependent and pili-dependent motility in the phytopathogen Xanthomonas campestris pv. campestris
Source: PubMed Central journal article supplement (PMC7029496; doi:10.1186/s12866-020-1712-3), 2020-02-18

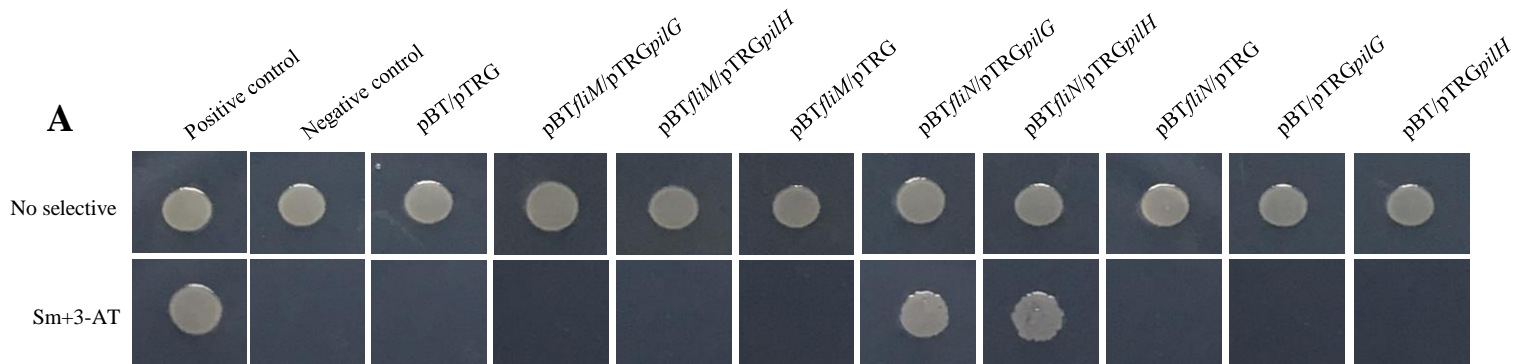

**B**

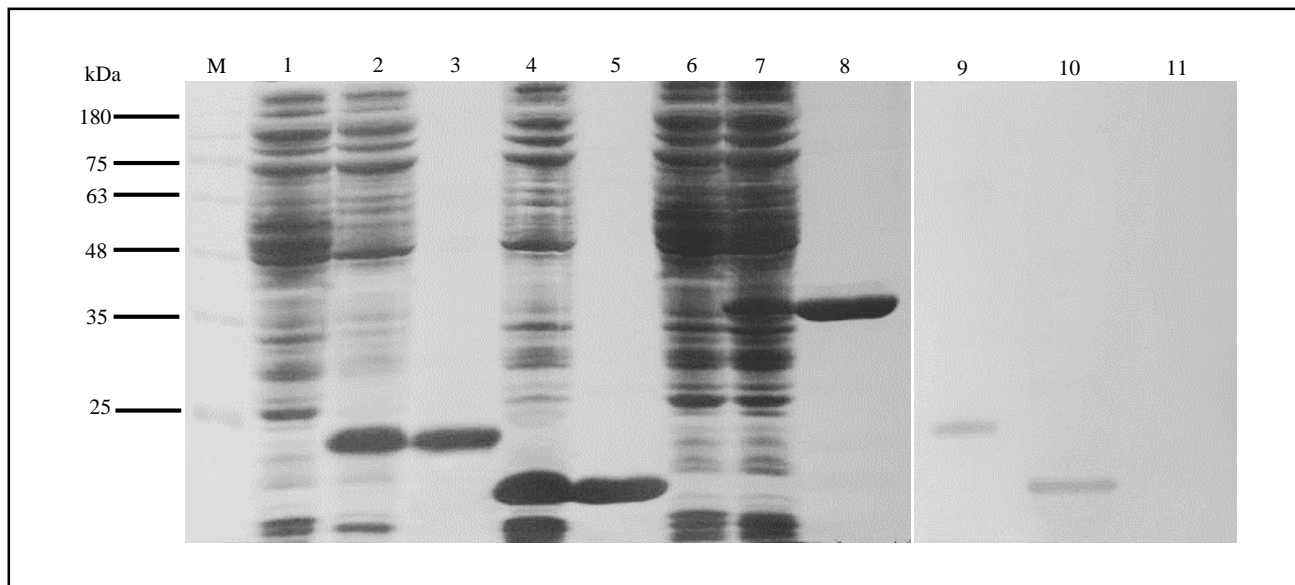

Supplement: 12866_2020_1712_MOESM4_ESM.pdf [file 12866_2020_1712_MOESM4_ESM.pdf]
